# Supplementary material
Source: PubMed Central journal article supplement (PMC2998083)
Supplement: supp_M110.163782_jbc.M110.163782-1.pdf [file supp_M110.163782_jbc.M110.163782-1.pdf]

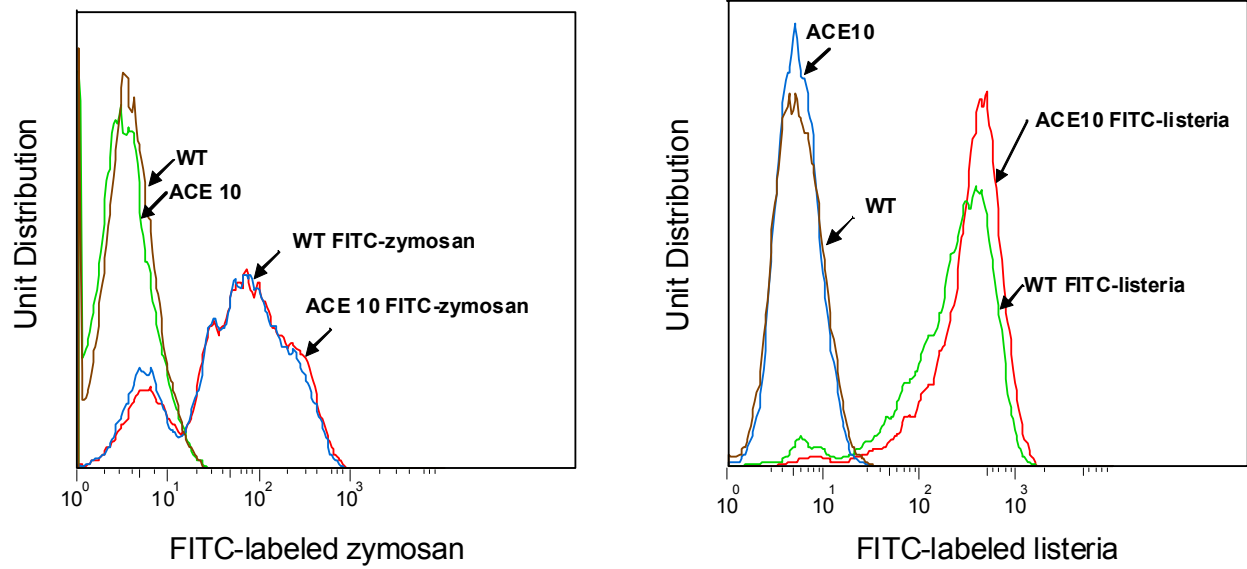

**Supplemental Figure 1.** Phagocytosis by ACE 10/10 and WT macrophages. TPMs were seeded at  $2.5 \times 10^5$  cells/well in 500  $\mu$ l medium in a 24-well plate. The cells were stimulated with 10 ng/ml IFN- $\gamma$  overnight and then treated with 100  $\mu$ g/ml FITC labelled zymosan or FITC labelled listeria for 30 min at 37°C. Cells were washed and analyzed by flow cytometry. There was no difference between ACE 10/10 and WT macrophages in phagocytosis.

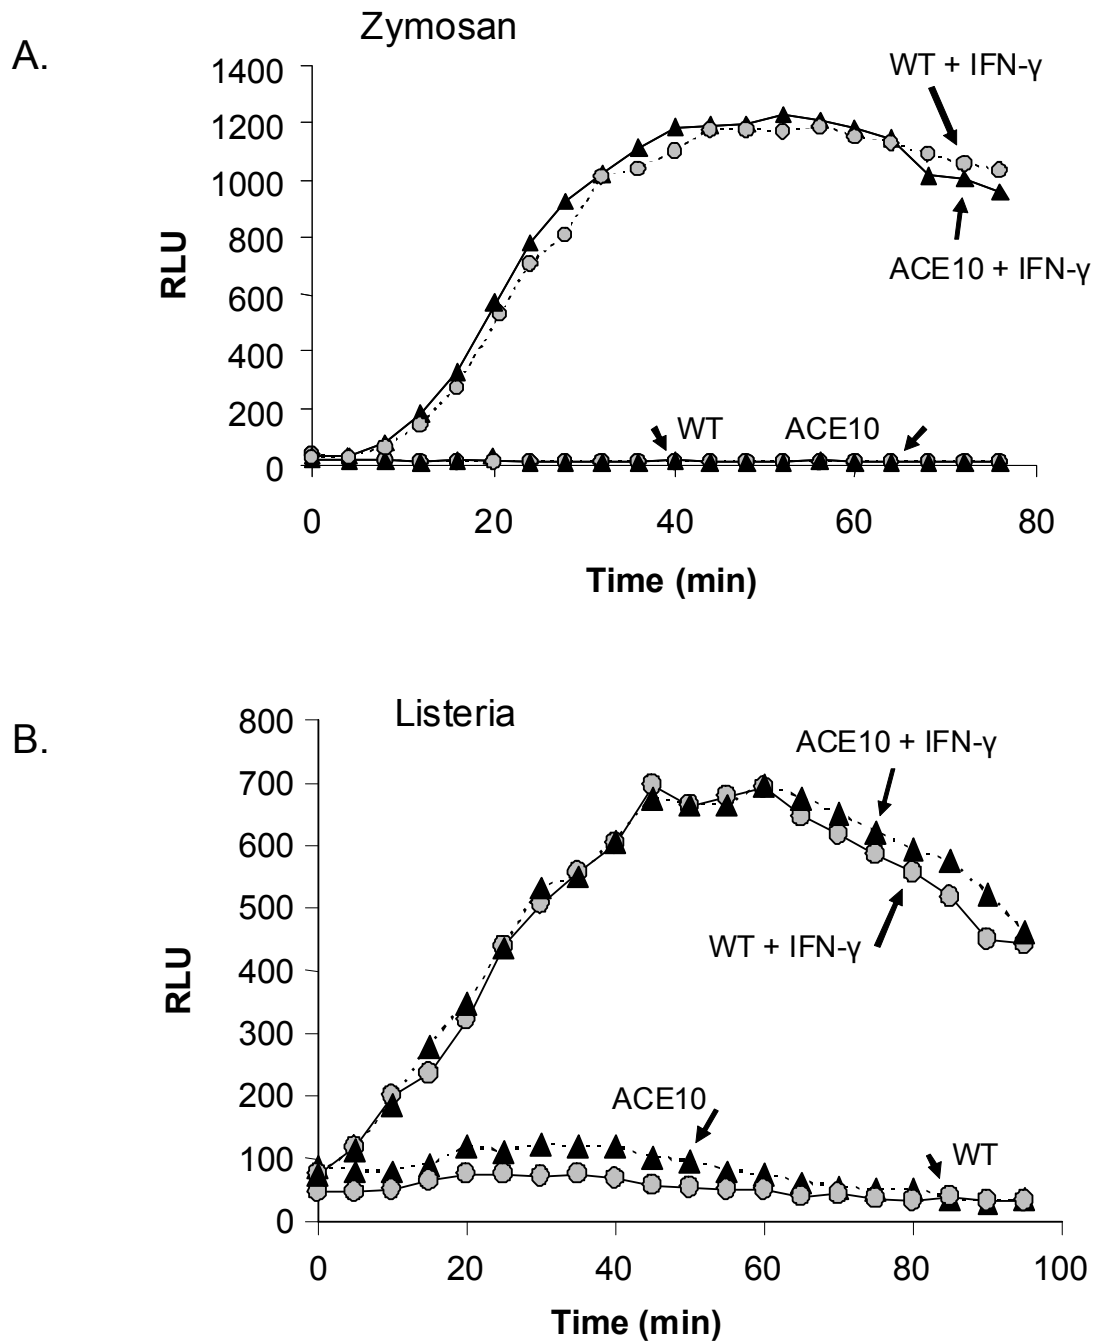

**Supplemental Fig. 2.** Generation of reactive oxygen species. TPMs were seeded at 50,000 cells/well in 50  $\mu$ l medium in a 96-well sterile plate. Cells were primed with 10 ng/ml IFN- $\gamma$  for 18hrs. Then, either zymosan particles (Fig. 2a) or  $5 \times 10^5$  listeria (Fig. 2b) and luminol were added and luminescence, expressed as relative light units (RLU), was measured over the course of approximately 80 min. WT (circles) and ACE 10/10. (triangles) macrophages showed no difference in production of reactive oxygen species. No difference between ACE 10/10 and WT cells was found.
